# Supplementary material for: Topological and Functional Characterization of an Insect Gustatory Receptor
Source: PubMed Central journal article supplement (PMC3163651; doi:10.1371/journal.pone.0024111), 2011-08-29
Supplement: pone.0024111.s001.pdf [file pone.0024111.s001.pdf]

AgGr2 -----MHSDEQIQMLMKTDLGSEI...  
NvGr2 -----MTAARAKPCGRHNASPR...  
ApGr5 -----  
HvCr5 -----  
BmGr4 -----  
HvCr1 -----  
BmGr6 -----  
BmGr5 -----  
AaGr4 -----  
CpGr4 -----  
AgGr15 -----  
DmGr5a -----  
DmGr64f -----  
BmGr6 -----  
AaGr5 -----  
CpGr5 -----  
CpGr5 -----  
AgGr16 -----  
BmGr1 -----  
NvGr1 -----  
ApGr2 -----  
ApGr3 -----  
ApGr4 -----  
ApGr1 -----  
TcGr16 -----  
TcGr17 -----  
TcGr5 -----  
TcGr8 -----  
TcGr9 -----  
TcGr10 -----  
TcGr11 -----  
TcGr14 -----  
TcGr18 -----  
TcGr12 -----  
TcGr13 -----  
AaGr12 -----  
CpGr15 -----  
AgGr14 -----  
CpGr12 -----  
CpGr14 -----  
AaGr10 -----  
AaGr18 -----  
CpGr11 -----  
CpGr13 -----  
CpGr10 -----  
AaGr9 -----  
AgGr17 -----  
DmGr64c -----  
DmGr64d -----  
CpGr16 -----  
CpGr17 -----  
AgGr19 -----  
AaGr8 -----  
CpGr8 -----  
AaGr7 -----  
CpGr2 -----  
CpGr8 -----  
AgGr20 -----  
DmGr61a -----  
DmGr64a -----  
DmGr64b -----  
TcGr19 -----  
TcGr4 -----  
BmGr7 -----  
TcGr15 -----  
BmGr8 -----  
ApGr6 -----  
AgGr13 -----
